# Supplementary material
Source: PubMed Central journal article supplement (PMC4970894)
Supplement: NIHMS788404-supplement-mir21_and_ptgs2_v3_text_Supplementary_Table_S1.pdf [file NIHMS788404-supplement-mir21_and_ptgs2_v3_text_Supplementary_Table_S1.pdf]

Supplementary Table S1. Regular aspirin use after diagnosis<sup>a</sup> and colorectal cancer mortality according to tumor *MIR21* expression level among 579 patients with stage I to III colorectal cancer

|                                                  | No. of cases                                 | Colorectal cancer-specific mortality |                         | Overall mortality                      |               |                         |                                        |
|--------------------------------------------------|----------------------------------------------|--------------------------------------|-------------------------|----------------------------------------|---------------|-------------------------|----------------------------------------|
|                                                  |                                              | No. of events                        | Univariable HR (95% CI) | Multivariable HR (95% CI) <sup>b</sup> | No. of events | Univariable HR (95% CI) | Multivariable HR (95% CI) <sup>b</sup> |
| <i>MIR21</i> expression level                    |                                              |                                      |                         |                                        |               |                         |                                        |
| <i>MIR21</i> low expression (quartiles 1 and 2)  |                                              |                                      |                         |                                        |               |                         |                                        |
| No aspirin use after diagnosis                   | 187                                          | 22                                   | 1 (reference)           | 1 (reference)                          | 74            | 1 (reference)           | 1 (reference)                          |
| Regular aspirin use after diagnosis              | 102                                          | 7                                    | 0.58 (0.25-1.37)        | 0.59 (0.25-1.39)                       | 47            | 1.19 (0.82-1.71)        | 0.96 (0.66-1.38)                       |
| <i>MIR21</i> high expression (quartiles 3 and 4) |                                              |                                      |                         |                                        |               |                         |                                        |
| No aspirin use after diagnosis                   | 185                                          | 43                                   | 1 (reference)           | 1 (reference)                          | 92            | 1 (reference)           | 1 (reference)                          |
| Regular aspirin use after diagnosis              | 105                                          | 23                                   | 1.05 (0.63-1.74)        | 1.12 (0.67-1.86)                       | 54            | 1.24 (0.89-1.74)        | 1.05 (0.74-1.47)                       |
|                                                  | <i>P</i> <sub>interaction</sub> <sup>c</sup> |                                      | 0.31                    | 0.20                                   |               | 0.90                    | 0.91                                   |

Abbreviations: CI, confidence interval; HR, hazard ratio.

<sup>a</sup> In the Nurses' Health Study, regular aspirin use was defined as the consumption of at least two tablets per week and no aspirin use was defined as consumption of fewer than 2 tablets per week. In the Health Professionals Follow-up Study, regular aspirin use was defined as the consumption of at least two times per week and no aspirin use was defined as consumption of fewer than 2 times per week.

<sup>b</sup> The multivariable Cox regression model included sex, age, year of diagnosis, family history of colorectal cancer in parent or sibling, tumor location, tumor differentiation, microsatellite instability, CpG island methylator phenotype, *KRAS*, *BRAF*, and *PIK3CA* mutations, and LINE-1 methylation level.

<sup>c</sup> *P*<sub>interaction</sub> values (two-sided) were calculated by the Wald test on the cross-product term of tumor *MIR21* expression (ordinal quartile categories [1 to 4]) and regular aspirin use after diagnosis (regular aspirin use vs. no aspirin use) variables in the Cox regression model.
